# Supplementary material
Source: Springer Nature journal article supplement (https://www.springermedizin.de/resource/supplementary/12911_2010_348_MOESM1_ESM.pdf/9525534)
Supplement: MOESM1 [file 9525534]

## **Additional file 1**

### **Configural frequency analysis**

The starting point for the analysis is a sample of  $n$  subjects, whose  $t$  attributes  $M_1, \dots, M_t$  were observed. Each of these attributes has  $r$  different categories (e.g., attribute  $M_1$  has  $r_1$  categories, attribute  $M_2$  has  $r_2$  categories, etc.). Overall, there are  $r_1 \times r_2 \times r_3 \times \dots \times r_t$  different configurations. The number of individuals that a specific configuration exhibits is counted and these numbers are then recorded in a  $t$ -dimensional contingency table as absolute frequencies [34]. However, it is possible that some configurations occur with a high probability, simply because the individual categories of the configurations have a high probability. To prevent a false identification of types due to a random combination of certain (predictor) variables, a chance correction is implemented. Using the chance correction, the expected value for a configuration is calculated under the null hypothesis of total independence of the variables and then subtracted from the absolute (observed) frequency of the configuration. Because the probabilities of the occurrence of the attribute categories are generally unknown, one acts on the assumption of a conditional probability of the configuration for fixed one-dimensional marginal frequencies and can then calculate the conditional expected values through simple multiplication. The values for each configuration

$$X^2 = (\text{observed frequency} - \text{expected frequency})^2 / \text{expected frequency}$$

can be assessed under the null hypothesis of the total independence using critical values for the chi-square distribution for 1 degree of freedom [49].

In prediction CFA, one is interested in predicting certain configurations by means of other configurations. For this purpose, the  $t$  attributes or variables  $M_1, \dots, M_t$  are divided into two subsets: one part of the  $t$  variables that can be considered as predictor variables, is denoted as  $s$  variables. The remaining variables ( $t-s$ ) are

supposed to be criterion variables. This means in the present study that of all 6 variables  $s=5$  are considered as predictor variables, while the remaining variable ( $t-s=6-5=1$ ) is regarded as the criterion to be predicted. The absolute frequencies of all possible configurations ( $s \times (t-s)$ ) are entered in a contingency table as in CFA. However, for each cell with a frequency  $f(s \times (t-s))$  a fourfold table is derived by considering in addition  $f(s) - f(s \times (t-s))$ ,  $f(t-s) - f(s \times (t-s))$ , and  $n - f(s) - f(t-s) + f(s \times (t-s))$ . A prediction type is assumed if the probability of the joint incidence of the configurations  $s \times (t-s)$  is greater than the conditional probability for given marginal frequencies under the null hypothesis on the independence of  $s$  and  $(t-s)$ . This is calculated by using Fisher exact tests [49].

#### Calculation of a prediction CFA

As an example, the prediction CFA of the predictor-criterion configuration (12212)×3 (T 1) is demonstrated as follows: There have been 91 patients expressing this particular configuration (Table 4). The corresponding fourfold table is shown in Table 5.

**Table 5: Fourfold table for predictor-criterion configuration (12212)×3**

|                                     |                                                |                    |
|-------------------------------------|------------------------------------------------|--------------------|
| $f(s \times (t-s))$<br>91           | $f(s) - f(s \times (t-s))$<br>54               | $f(s)$<br>145      |
| $f(t-s) - f(s \times (t-s))$<br>810 | $n - f(s) - f(t-s) + f(s \times (t-s))$<br>959 | $n - f(s)$<br>1769 |
| $f(t-s)$<br>901                     | $n - f(t-s)$<br>1013                           | $n$<br>1914        |

Is only a pocket calculator available, one uses the normal approximation of Fisher's exact test. The z-value is being calculated [53]:

$$Z_{(s \cdot (t-s))} = \frac{f(s) \cdot f(t-s)}{(f(s) \cdot (t-s)) - \frac{f(s) \cdot f(t-s)}{n} - 0.5) \cdot n \cdot \sqrt{n-1}}{\sqrt{f(s) \cdot (n-f(s)) \cdot f(t-s) \cdot (n-f(t-s))}}$$

Using the fourfold table entries, this yields to:

$$Z_{12212x3} = \frac{(91 - \frac{145 \cdot 901}{1914} - 0.5) \cdot 1914 \cdot \sqrt{1913}}{\sqrt{145 \cdot (1914 - 145) \cdot 901 \cdot 1013}} = 3.848279$$

The corresponding P-value is:

$$P_{12212x3} = 1 - \Phi(3.848) = 1 - 0.999940 = 0.000059$$

This value can be found in table 2 ( $T1 = 0.000058$ ) with a slight difference due to rounding errors. Since this value is smaller than the adjusted  $\alpha^* = 0.05 \div 20 = 0.0025$  one assumes a prediction type (T1).

**Table 4: Frequencies for the prediction configural frequency analyses of the confirmatory sample**

| Predictor configurations |                |                |                |                | Confirmatory sample <sup>†</sup><br>(n = 1914) |     |       |      |
|--------------------------|----------------|----------------|----------------|----------------|------------------------------------------------|-----|-------|------|
|                          |                |                |                |                | M <sub>6</sub>                                 |     |       |      |
| M <sub>1</sub>           | M <sub>2</sub> | M <sub>3</sub> | M <sub>4</sub> | M <sub>5</sub> | 1                                              | 2   | 3     | Σ    |
| 1                        | 1              | 1              | 1              | 1              | 7                                              | 8   | 5     | 20   |
| 1                        | 1              | 1              | 1              | 2              | 11                                             | 16  | 26    | 53   |
| 1                        | 1              | 1              | 1              | 3              | 5                                              | 8   | 19    | 32   |
| 1                        | 1              | 1              | 2              | 1              | 8                                              | 5   | 6     | 19   |
| 1                        | 1              | 1              | 2              | 2              | 9                                              | 7   | 8     | 24   |
| 1                        | 1              | 1              | 2              | 3              | 1                                              | 3   | 8     | 12   |
| 1                        | 1              | 2              | 1              | 1              | 4                                              | 1   | 5     | 10   |
| 1                        | 1              | 2              | 1              | 2              | 7                                              | 14  | 34    | 55   |
| 1                        | 1              | 2              | 1              | 3              | 1                                              | 8   | 13    | 22   |
| 1                        | 1              | 2              | 2              | 1              | 7                                              | 9   | 1     | 17   |
| 1                        | 1              | 2              | 2              | 2              | 5                                              | 8   | 9     | 22   |
| 1                        | 1              | 2              | 2              | 3              | 2                                              | 1   | 4     | 7    |
| 1                        | 2              | 1              | 1              | 1              | 2                                              | 5   | 7     | 14   |
| 1                        | 2              | 1              | 1              | 2              | 8                                              | 14  | 38    | 60   |
| 1                        | 2              | 1              | 1              | 3              | 5                                              | 8   | 25    | 38   |
| 1                        | 2              | 1              | 2              | 1              | 4                                              | 1   | 1     | 6    |
| 1                        | 2              | 1              | 2              | 2              | 3                                              | 6   | 1     | 10   |
| 1                        | 2              | 1              | 2              | 3              | 1                                              | 3   | 2     | 6    |
| 1                        | 2              | 2              | 1              | 1              | 4                                              | 5   | 12    | 21   |
| 1                        | 2              | 2              | 1              | 2              | 12                                             | 42  | 91 T1 | 145  |
| 1                        | 2              | 2              | 1              | 3              | 3                                              | 15  | 45 T2 | 63   |
| 1                        | 2              | 2              | 2              | 1              | 9                                              | 7   | 4     | 20   |
| 1                        | 2              | 2              | 2              | 2              | 6                                              | 10  | 17    | 33   |
| 1                        | 2              | 2              | 2              | 3              | 5                                              | 8   | 22    | 35   |
| 2                        | 1              | 1              | 1              | 1              | 13                                             | 9   | 9     | 31   |
| 2                        | 1              | 1              | 1              | 2              | 17                                             | 27  | 23    | 67   |
| 2                        | 1              | 1              | 1              | 3              | 7                                              | 14  | 12    | 33   |
| 2                        | 1              | 1              | 2              | 1              | 29 T3                                          | 13  | 9     | 51   |
| 2                        | 1              | 1              | 2              | 2              | 13                                             | 6   | 12    | 31   |
| 2                        | 1              | 1              | 2              | 3              | 3                                              | 4   | 2     | 9    |
| 2                        | 1              | 2              | 1              | 1              | 11                                             | 10  | 7     | 28   |
| 2                        | 1              | 2              | 1              | 2              | 16                                             | 17  | 18    | 51   |
| 2                        | 1              | 2              | 1              | 3              | 1                                              | 10  | 11    | 22   |
| 2                        | 1              | 2              | 2              | 1              | 12                                             | 7   | 8     | 27   |
| 2                        | 1              | 2              | 2              | 2              | 9                                              | 9   | 8     | 26   |
| 2                        | 1              | 2              | 2              | 3              | 4                                              | 3   | 1     | 8    |
| 2                        | 2              | 1              | 1              | 1              | 12                                             | 12  | 8     | 32   |
| 2                        | 2              | 1              | 1              | 2              | 11                                             | 31  | 50    | 92   |
| 2                        | 2              | 1              | 1              | 3              | 7                                              | 9   | 26    | 42   |
| 2                        | 2              | 1              | 2              | 1              | 8                                              | 10  | 5     | 23   |
| 2                        | 2              | 1              | 2              | 2              | 10                                             | 7   | 12    | 29   |
| 2                        | 2              | 1              | 2              | 3              | 1                                              | 6   | 6     | 13   |
| 2                        | 2              | 2              | 1              | 1              | 16                                             | 17  | 20    | 53   |
| 2                        | 2              | 2              | 1              | 2              | 29                                             | 78  | 130   | 237  |
| 2                        | 2              | 2              | 1              | 3              | 12                                             | 24  | 56    | 92   |
| 2                        | 2              | 2              | 2              | 1              | 26 T4                                          | 20  | 12    | 58   |
| 2                        | 2              | 2              | 2              | 2              | 22                                             | 24  | 33    | 79   |
| 2                        | 2              | 2              | 2              | 3              | 6                                              | 10  | 20    | 36   |
| Σ                        |                |                |                |                | 424                                            | 589 | 901   | 1914 |

Predictor variables: M<sub>1</sub>=Information-seeking preference (1=low, 2=high), M<sub>2</sub>=Trust in physician (1= <average, 2= >average), M<sub>3</sub>=Physicians' PDM style (1=negative, 2=positive), M<sub>4</sub>=Educational level (1=low, 2=high), and M<sub>5</sub>=Age (1= ≤55years, 2=56-75years, 3= ≥76years), and criterion variable: M<sub>6</sub>= Control preferences (1=active role, 2=collaborative role, 3=passive role). †confirmed prediction types are marked with a "T".
